# Supplementary material for: Single-Domain Antibodies for Targeting, Detection, and In Vivo Imaging of Human CD4+ Cells
Source: PubMed Central journal article supplement (PMC8696186; doi:10.3389/fimmu.2021.799910), 2021-12-09
Supplement: DataSheet_1.pdf [file DataSheet_1.pdf]

## **Single-domain antibodies for targeting, detection and *in vivo* imaging of human CD4<sup>+</sup> cells**

*Bjoern Traenkle<sup>1</sup>, Philipp D. Kaiser<sup>1</sup>, Stefania Pezzana<sup>2</sup>, Jennifer Richardson<sup>3</sup>, Marius Gramlich<sup>1</sup>, Teresa R. Wagner<sup>1,4</sup>, Dominik Seyfried<sup>2,7</sup>, Melissa Weldle<sup>4</sup>, Stefanie Holz<sup>4</sup>, Yana Parfyonova<sup>4</sup>, Stefan Nueske<sup>5</sup>, Armin M. Scholz<sup>5</sup>, Anne Zeck<sup>1</sup>, Meike Jakobi<sup>1</sup>, Nicole Schneiderhan-Marra<sup>1</sup>, Martin Schaller<sup>6</sup>, Andreas Maure<sup>2,8</sup>, Cécile Gouttefangeas<sup>3,7,8</sup>, Manfred Kneilling<sup>2,6,8</sup>, Bernd J. Pichler<sup>2,7,8</sup>, Dominik Sonanin<sup>2,9</sup>, and Ulrich Rothbauer<sup>1,4,8#</sup>*

### Affiliations/Addresses

<sup>1</sup> NMI Natural and Medical Sciences Institute at the University of Tübingen, Reutlingen, Germany

<sup>2</sup> Werner Siemens Imaging Center, Department of Preclinical Imaging and Radiopharmacy, University of Tübingen, Tübingen, Germany

<sup>3</sup> Department of Immunology, Institute of Cell Biology, University of Tübingen, Tübingen, Germany

<sup>4</sup> Pharmaceutical Biotechnology, Eberhard Karls University Tübingen, Germany

<sup>5</sup> Livestock Center of the Faculty of Veterinary Medicine, Ludwig Maximilians University Munich, Oberschleissheim, Germany

<sup>6</sup> Department of Dermatology, University of Tübingen, Tübingen, Germany

<sup>7</sup> German Cancer Consortium (DKTK) and German Cancer Research Center (DKFZ) partner site Tübingen, Tübingen, Germany

<sup>8</sup> Cluster of Excellence iFIT (EXC2180) "Image-Guided and Functionally Instructed Tumor Therapies", University of Tübingen, Germany<sup>9</sup> Department of Medical Oncology and Pneumology, University of Tübingen, Tübingen, Germany

# corresponding author

Prof. Dr. Ulrich Rothbauer, Natural and Medical Sciences Institute at the University of Tübingen  
Markwiesenstr. 55, 72770 Reutlingen, Germany.

E-mail: ulrich.rothbauer@uni-tuebingen.de

Phone: +49 7121 51530-415

Fax: +49 7121 51530-816

Orcid ID: 0000-0001-5923-8986

## Supplementary Information

### Supplementary Figure 1

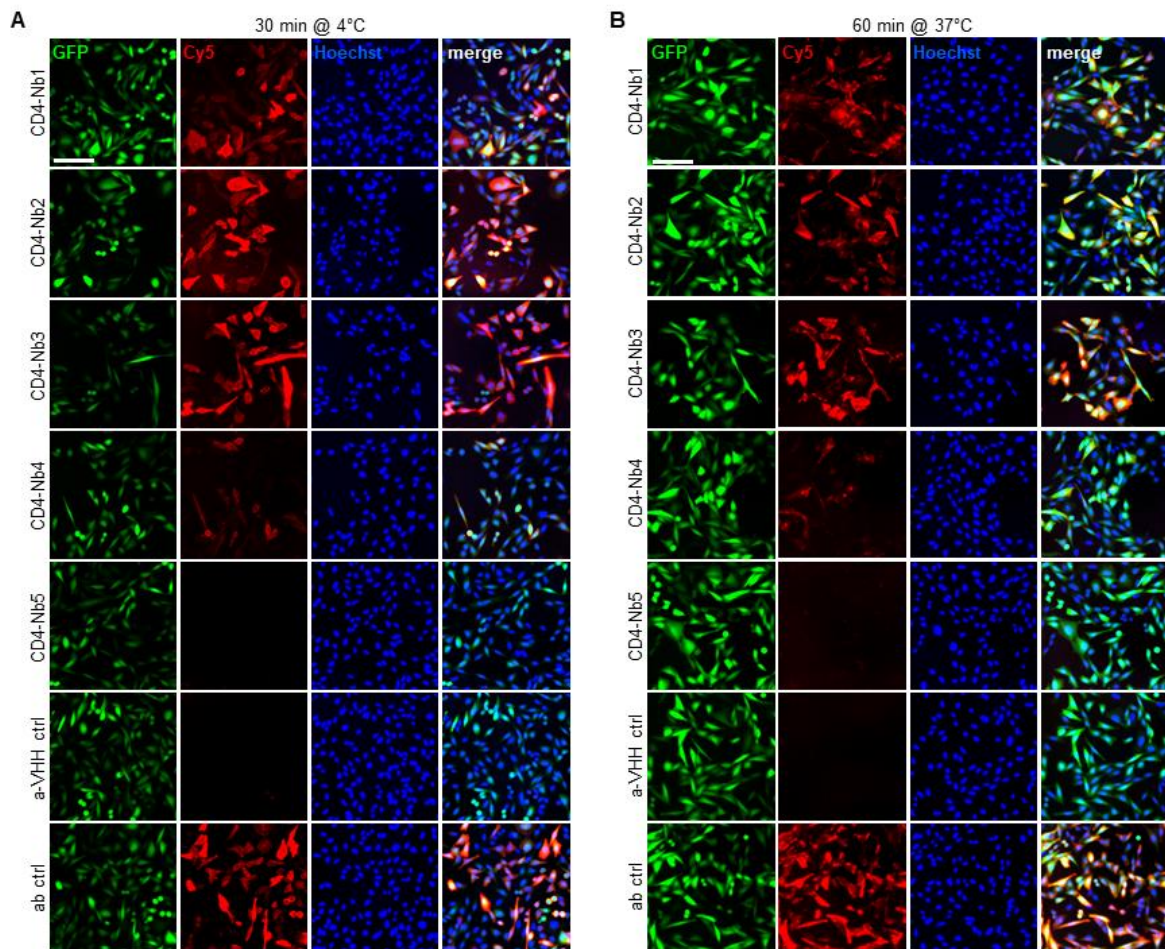

**Supplementary Figure 1** Live-cell immunofluorescence staining of CHO-hCD4 cells incubated with CD4-Nbs (100 nM) followed by detection using a secondary Cy5-labeled anti-VHH antibody and 2  $\mu\text{g}/\text{ml}$  Hoechst33258 for 30 min at 4°C (**A**) or 60 min at 37°C (**B**). Shown are representative images of CHO-hCD4 cells simultaneously expressing cytosolic GFP (left column) and hCD4 (second column from left) from a bicistronic mRNA. Nuclear staining and merge of channels is shown in column 3 and 4 from the left. Negative control staining using secondary Cy5-labeled anti-VHH antibody alone (a-VHH ctrl) and positive control using Cy5-labeled anti-hCD4 antibody (ab ctrl) are shown in bottom two rows. Scale bar 100  $\mu\text{m}$ .

## Supplementary Figure 2

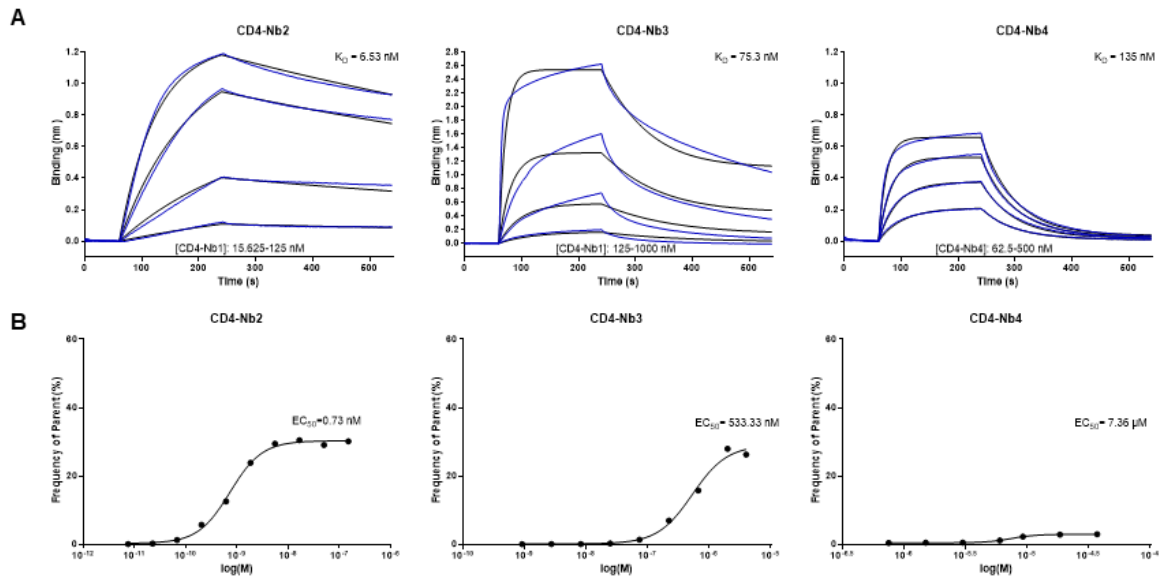

**Supplementary Figure 2** Affinities of identified CD4-Nbs (**A**) Sensograms of biolayer interferometry-based affinity measurements of CD4-Nb2, CD4-Nb3 and CD4-Nb4 are shown. Biotinylated hCD4 was immobilized on streptavidin biosensors and kinetic measurements were performed by using four concentrations of purified Nbs ranging from 15.6 nM - 1  $\mu$ M. (**B**)  $EC_{50}$  determination of CD4-Nbs for cellular expressed hCD4 by flow cytometry. The percentage of positively stained HEK293-hCD4 (frequency of parent) was plotted against indicated concentrations of CD4-Nbs.  $EC_{50}$  values were calculated from a four-parametric sigmoidal model.

Supplementary Figure 3

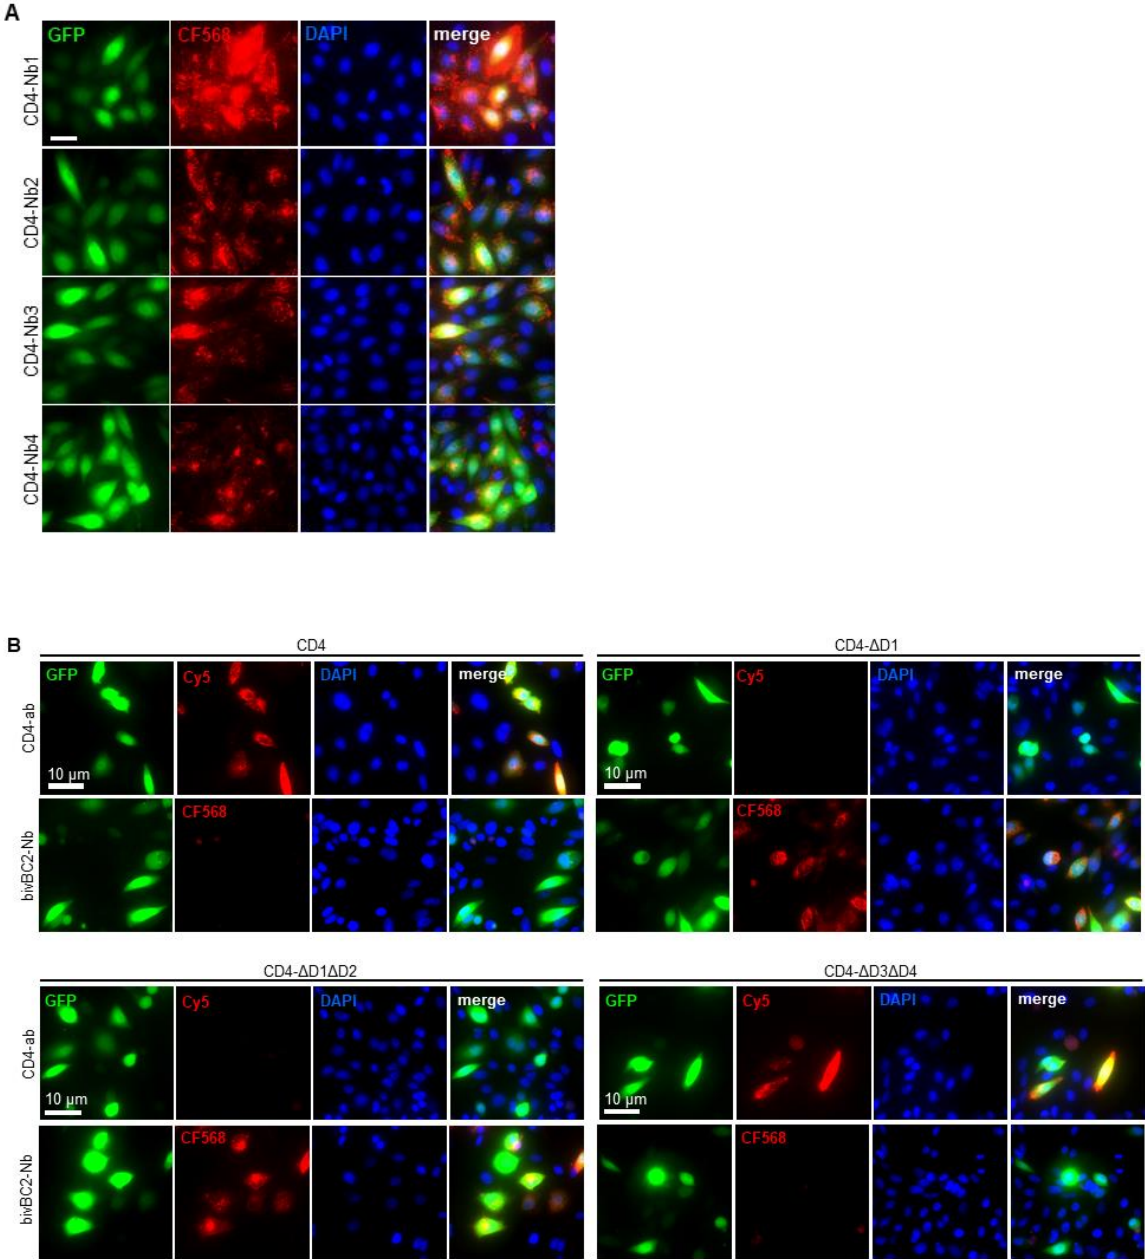



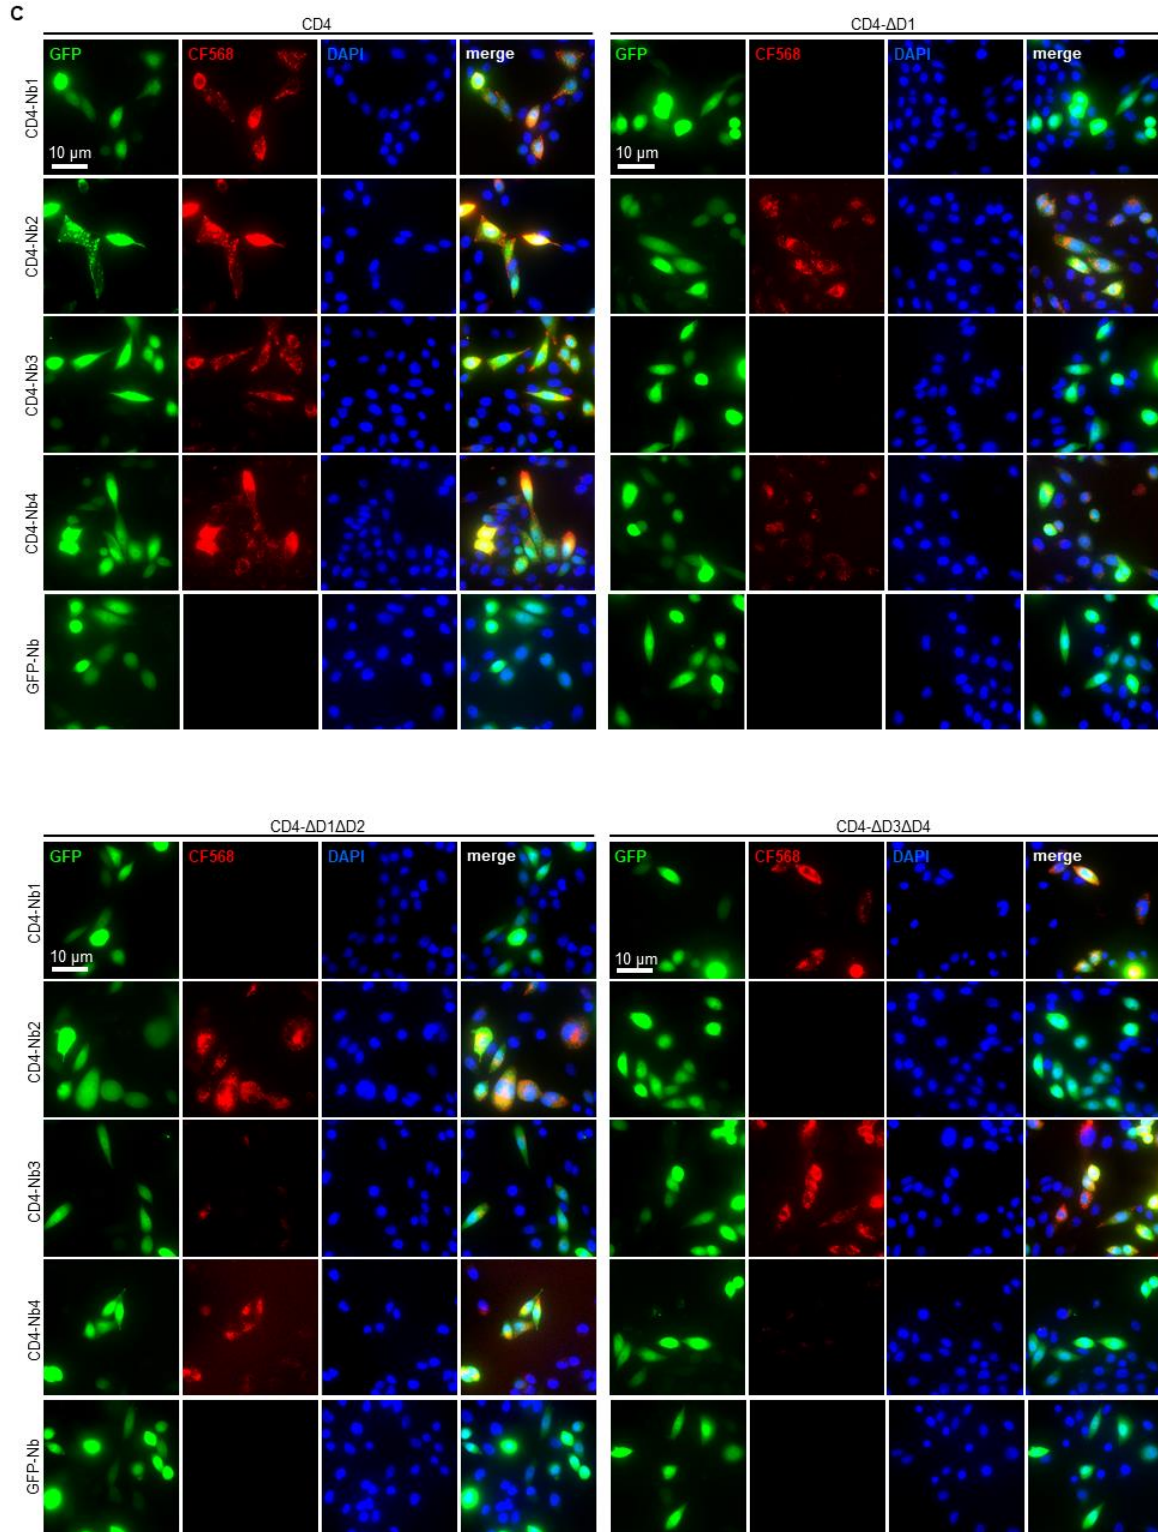

**Supplementary Figure 3** CD4-Nbs bind different domains of human CD4. (A) Live-cell immunofluorescence staining of CHO-hCD4 cells with CD4-Nbs coupled to the fluorescent dye CF568, and 2 μg/ml Hoechst33258 for 60 min at 37°C. (B) Control staining of full-length hCD4 (CD4) or hCD4 domain-deletion mutants CD4-Δ1, CD4-Δ1Δ2 or CD4-Δ3Δ4 with

fluorescently labeled anti-CD4 antibody RPA-T4-PE/Cy5 (CD4-ab) or bivalent BC2-Nb coupled to CF568 (bivBC2-Nb). **(C)** Live-cell immunofluorescence staining of CHO cells transiently expressing full-length hCD4 or hCD4 indicated domain-deletion mutants with CF568-labeled CD4-Nbs or a non-specific GFP-Nb (100 nM). Scale bars 10  $\mu$ m.

**Supplementary Figure 4**

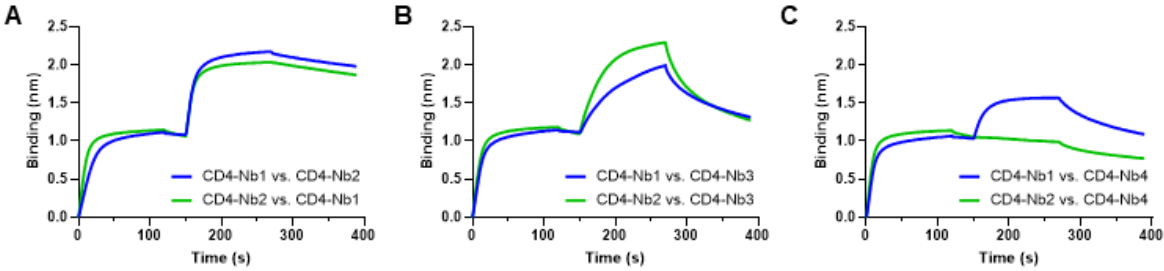

**Supplementary Figure 4** Epitope binning analysis of CD4-Nbs by biolayer interferometry (BLI)

(A) Representative BLI sensograms of single measurements of combinatorial Nb binding to the recombinant extracellular portion of hCD4 of CD4-Nb1 (blue) and CD4-Nb2 (green) with (A) one another, (B) CD4-Nb3, or (C) CD4-Nb4.



## Supplementary Figure 5

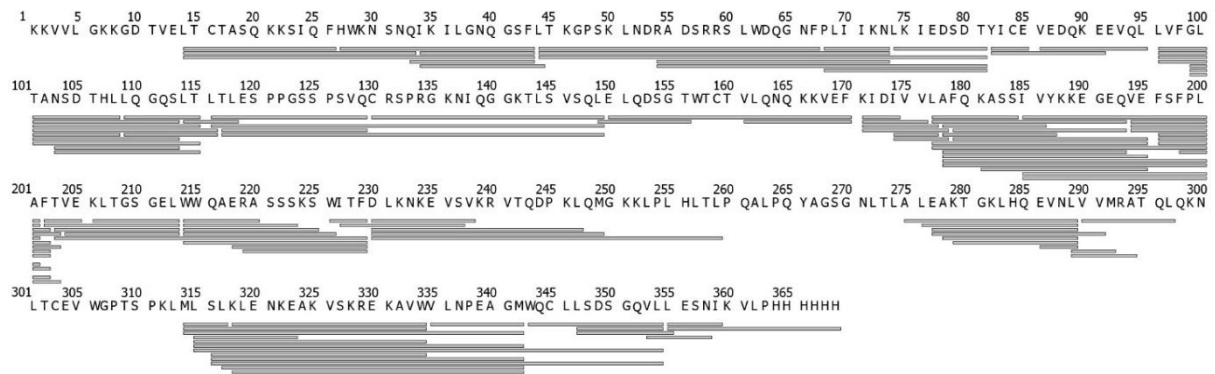

**Supplementary Figure 5** Peptide sequence coverage of human CD4 for HDX-MS analysis.

116 possible peptides could be identified by MSMS (depicted as bars) leading to a sequence coverage of 88% for the HDX analysis.

# Supplementary Figure 6

**A**

PBMC Donor 1

Unstained PBMC

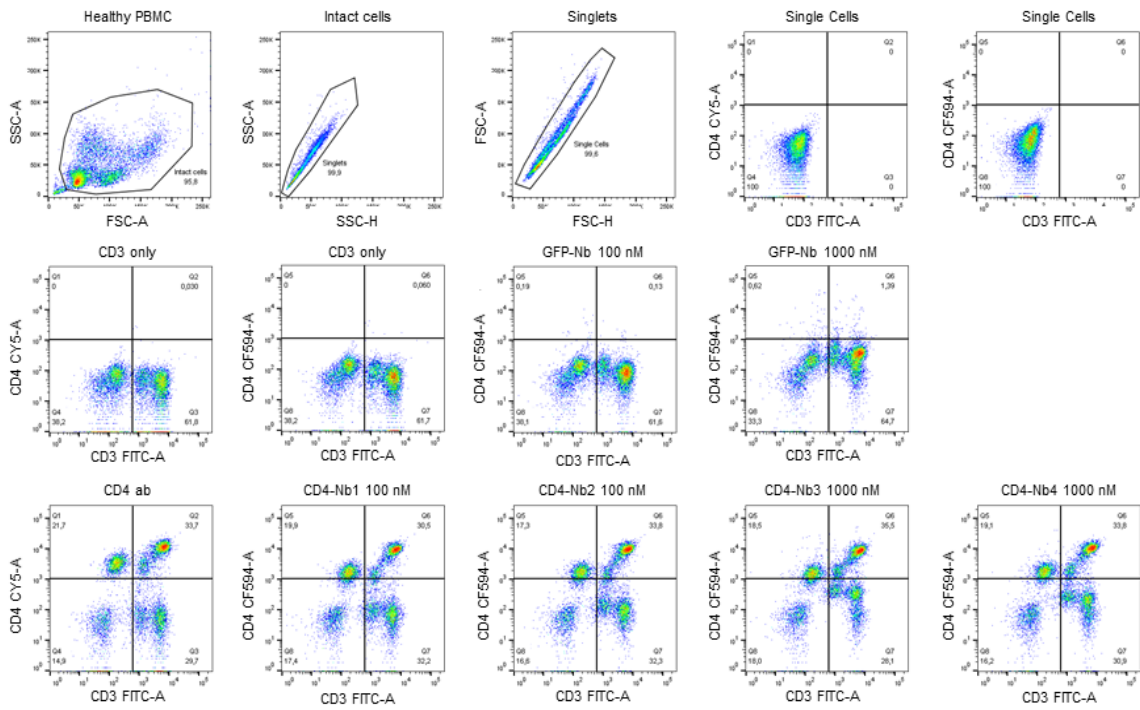

**B**

PBMC Donor 2

Unstained PBMC

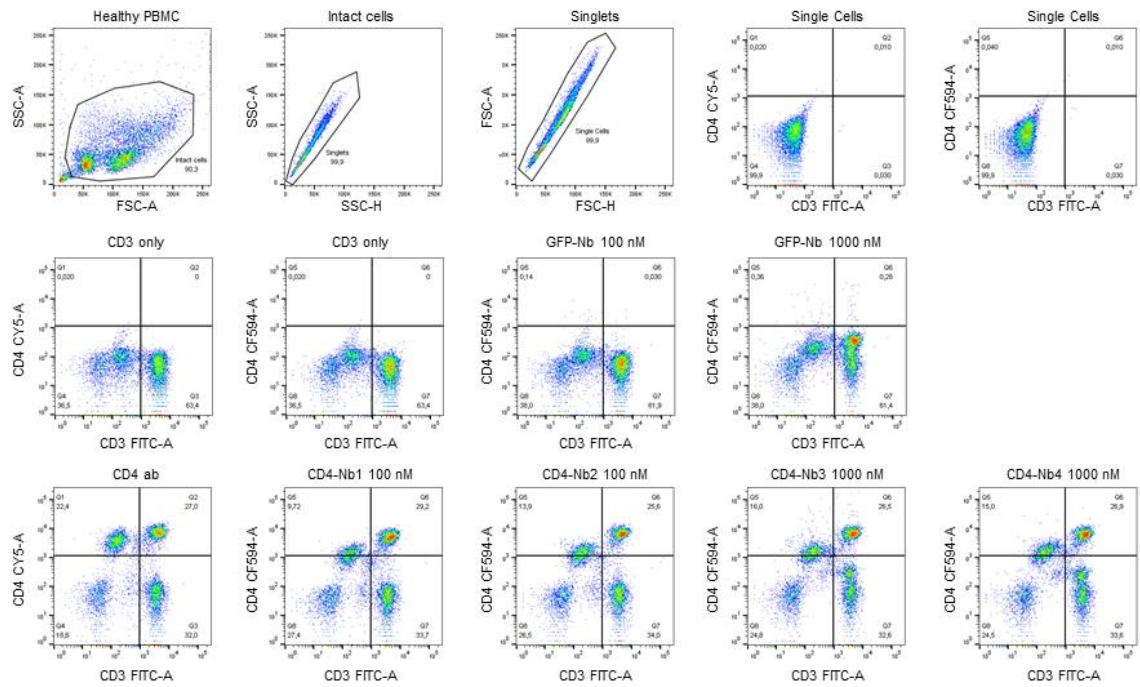

**C**

PBMC Donor 3

Unstained PBMC

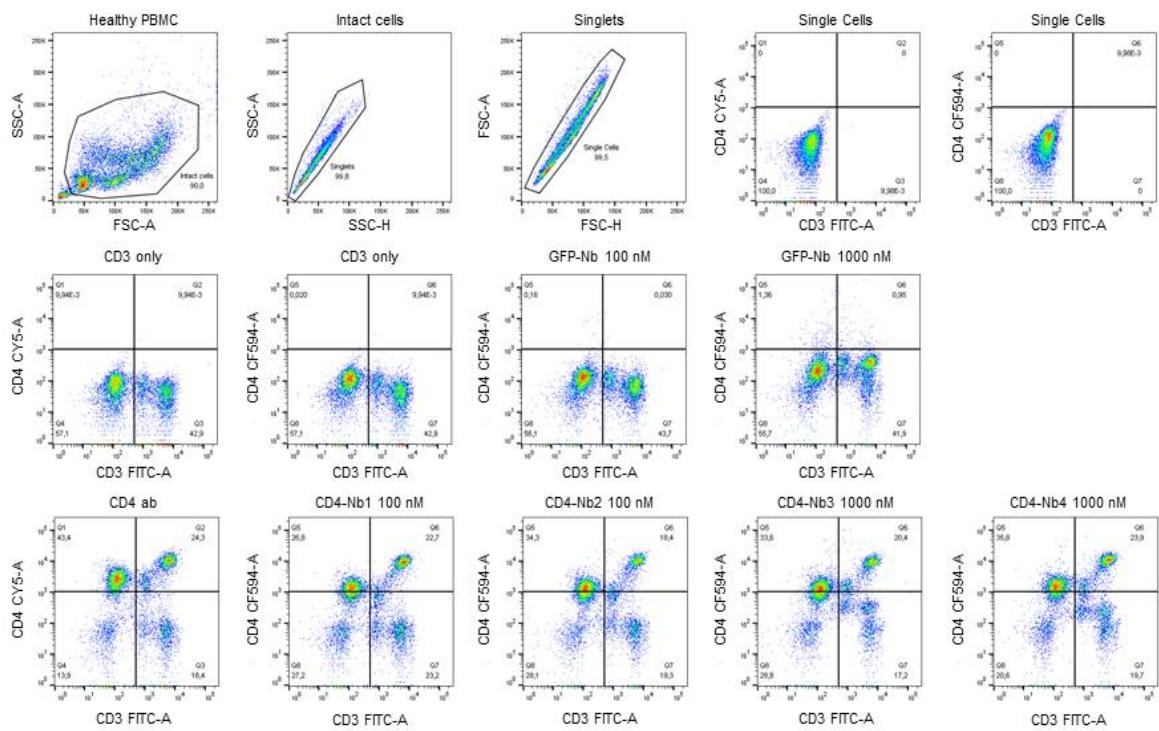

**Supplementary Figure 6** Binding of CD4-Nbs to CD4<sup>+</sup> cells present in human PBMCs. Top row shows gating strategy for flow cytometry analysis of CD4<sup>+</sup>CD3<sup>+</sup> double-positive human PBMCs. Middle and bottom row shows final gating step and quantification of these cells for donor 1 (**A**), donor 2 (**B**), and donor 3 (**C**) stained with an anti-CD4 antibody (CD4 ab), anti-GFP control Nb (GFP-Nb), or CD4-Nb1 - CD4-Nb4 at indicated concentrations.

## Supplementary Figure 7

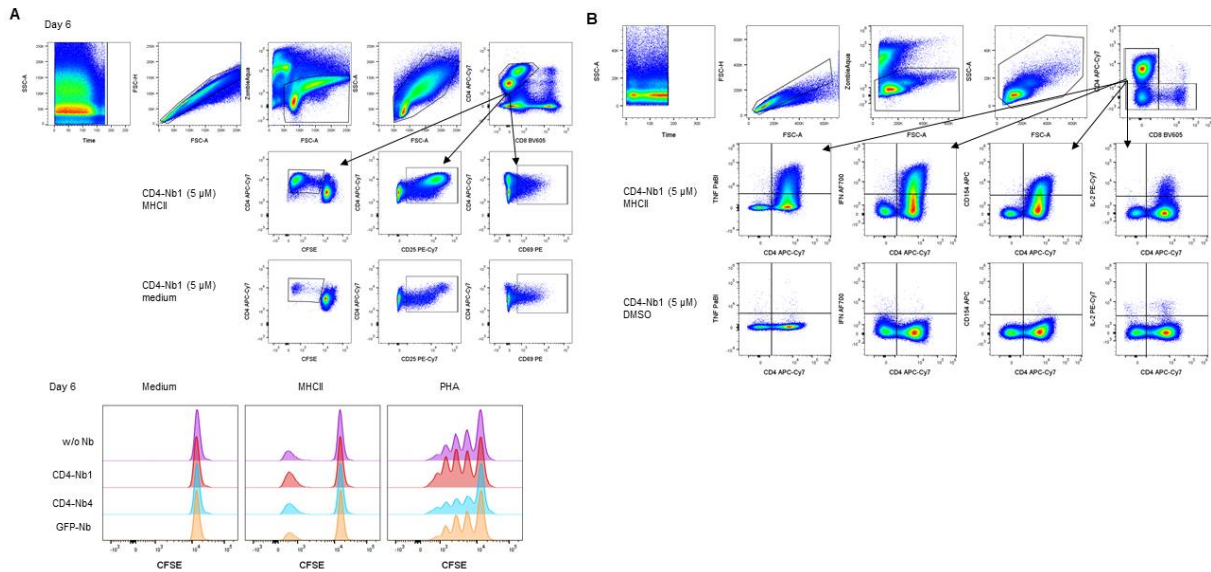

**Supplementary Figure 7** Determination of the effect of CD4-Nbs on CD4<sup>+</sup> T cells. **(A)** Gating strategy for analysis of proliferation and activation of CD4<sup>+</sup> cells after stimulation. Top row from left to right: Time gate, single cells, live cells, lymphocytes, CD4<sup>+</sup> cells. Middle and bottom rows: gates were placed on proliferating CFSE-low/negative CD4<sup>+</sup> cells (left), CD25<sup>+</sup>CD4<sup>+</sup> cells (middle) and CD69<sup>+</sup>CD4<sup>+</sup> cells (right). Histogram overlay shows the number of divisions as CFSE labeling within CD4<sup>+</sup> cells. Shown is one representative example (donor 2) on day 6. **(B)** Gating strategy (donor 3) for analysis of activation marker and cytokine expression of CD4<sup>+</sup> cells in intracellular staining after 12 days of culture and 14 h restimulation. Top row from left to right: Time gate, single cells, live cells, lymphocytes, CD4<sup>+</sup> cells, CD4/CD8 staining (gating on CD8<sup>neg</sup> cells). Middle and bottom rows show the expression of TNF, IFN- $\gamma$ , CD154 and IL-2 after restimulation with MHC-class II peptides or control DMSO/water.

## Supplementary Figure 8

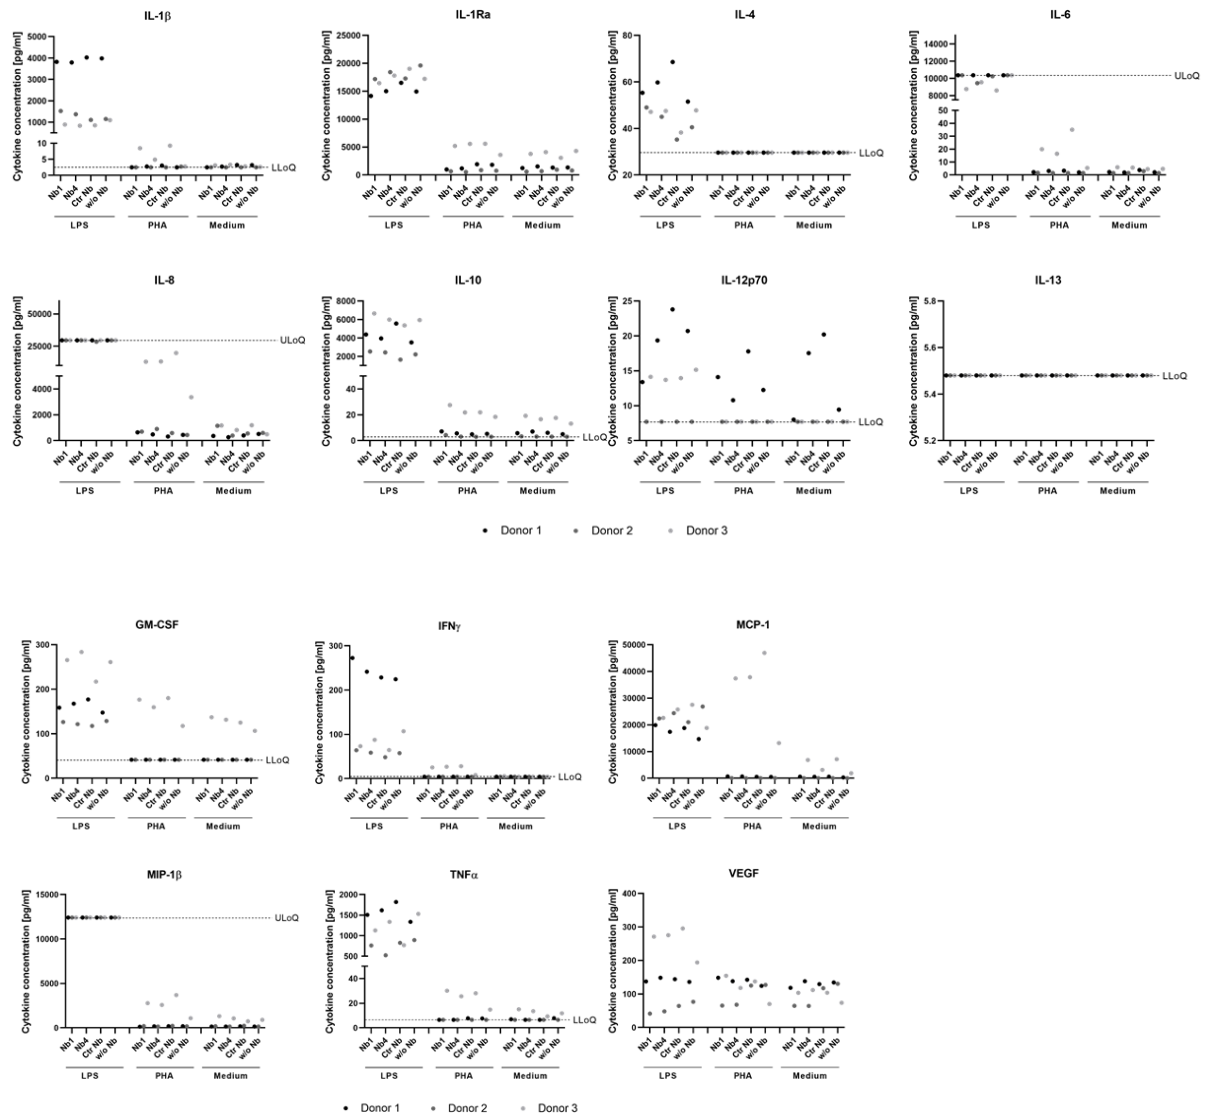

**Supplementary Figure 8** Determination of cytokines secreted from whole blood samples of donors after treatment with CD4-Nbs. Blood samples of three donors were incubated with 5  $\mu$ M CD4-Nb1, CD4-Nb4, GFP-Nb (control) or w/o Nb and stimulated with lipopolysaccharide (LPS), phytohaemagglutinin (PHA) or medium only as control. Secreted cytokines (listed in table S2) were measured and quantified using an in-house developed microsphere-based (Luminex) multiplex sandwich immunoassay. Results of one biological experiment are shown as colored dots indicating measured cytokine levels of one individual.

## Supplementary Figure 9

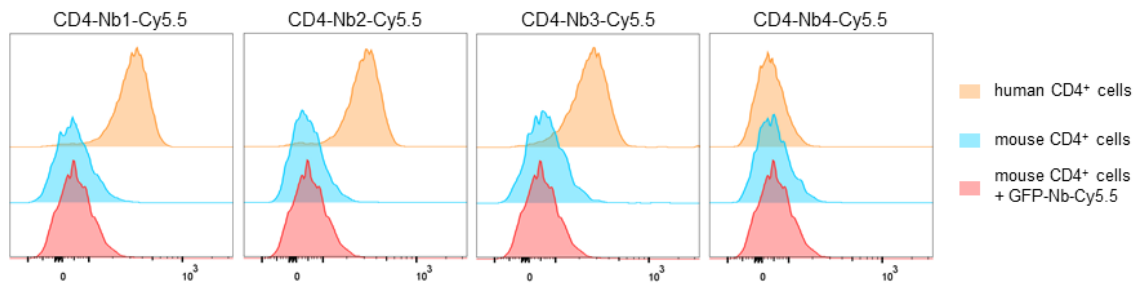

**Supplementary Figure 9** Cross-species reactivity testing of Cy5.5-labeled CD4-Nbs. Flow cytometry of human and mouse CD4<sup>+</sup> cells stained with CD4-Nbs-Cy5.5 or GFP-Nb-Cy5.5. Binding to human CD4 was confirmed for CD4-Nb1, CD4-Nb2 and CD4-Nb3. CD4-Nb4 did not show staining at this concentration (0.75 µg/ml, ~49 nM). None of the tested CD4-Nbs stained murine CD4.



**Supplementary Figure 10**

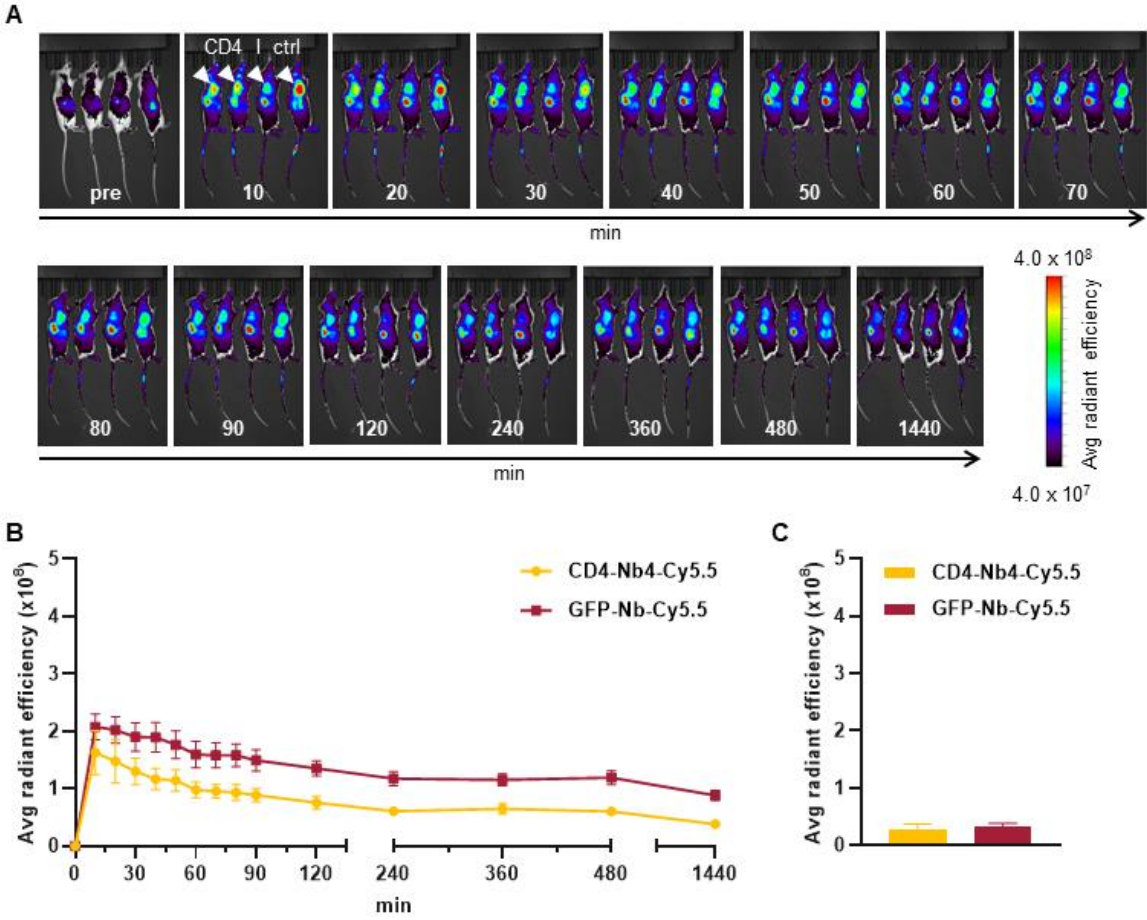

**Supplementary Figure 10** *In vivo* optical imaging (OI) of low-affinity binding CD4-Nb4-Cy5.5. 5  $\mu$ g of CD4-Nb4-Cy5.5-or GFP-Nb-Cy5.5 were administered *i.v.* to *subcutaneously* human CD4<sup>+</sup> HPB-ALL-bearing NSG mice and tumor bio distribution was monitored by repetitive OI measurements over the course of 24 h. **(A)** Representative images of each measurement time point of 4 mice injected either with CD4-Nb4-Cy5.5 (left, CD4) or GFP-Nb-Cy5.5 (right, ctrl). White arrows indicate the tumor localization at the right upper flank. **(B)** Quantification of the fluorescence signal from the tumors (n = 4 per group, arithmetic mean of the average radiant efficiency  $\pm$  SEM). **(C)** After the last imaging time point, tumors were explanted for *ex vivo* OI, demonstrating similar accumulation of CD4-Nb4-Cy5.5 and GFP-Nb-Cy5.5 (n = 2 per group, arithmetic mean  $\pm$  SEM)

## Supplementary Figure 11

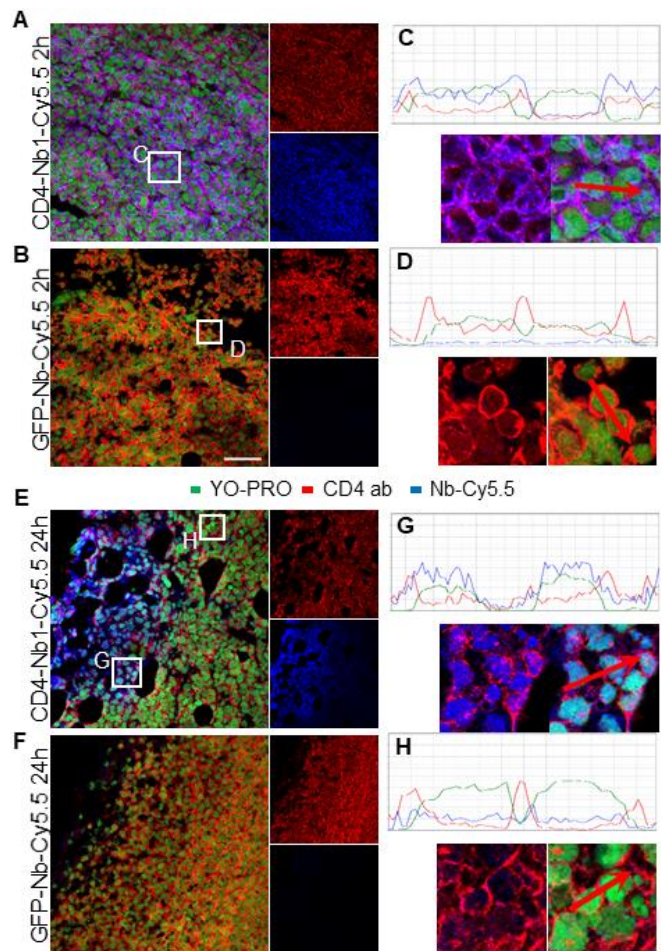

**Supplementary Figure 11** Immunofluorescence staining of *ex vivo* HPB-ALL tumors. Cryosections from *ex vivo* HPB-ALL tumors were imaged for bound Nb (blue) from the systemic injection in xenografted mice and co-stained with CD4-specific antibody (red) and nuclear YO-PRO staining (green). Image overlay of CD4-Nb1 (**A**) or control GFP-Nb (**B**) with CD4 antibody fluorescence after 2 hours of Nb injection. (**C**, **D**) Line-scan quantification of indicated image sections from A and B. (**E**, **F**) same as A and B after 24 h of systemic Nb injection. (**G**, **H**) Line-scan analysis of indicated image sections from E of strongly stained area (G) or weakly stained area (H).

## Supplementary Figure 12

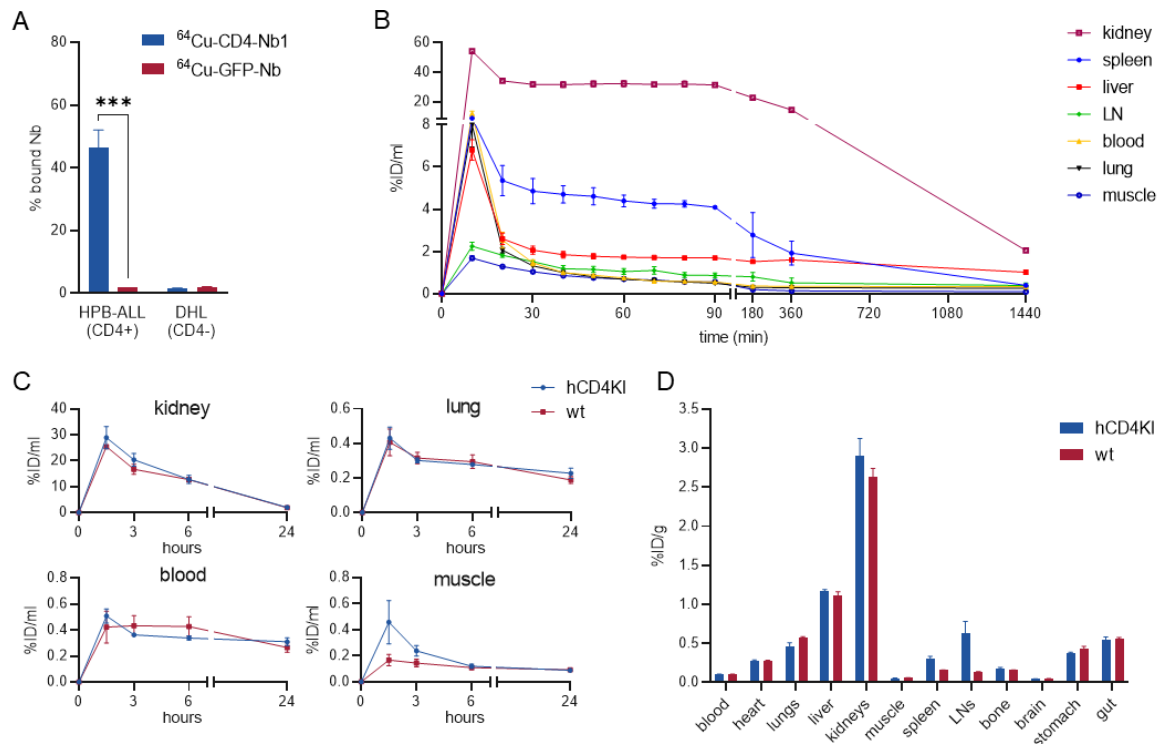

**Supplementary Figure 12**  $^{64}\text{Cu}$ -CD4-Nb1 specifically accumulates in CD4<sup>+</sup> T cell-rich organs. (A) *in vitro* binding of  $^{64}\text{Cu}$ -CD4-Nb1 or  $^{64}\text{Cu}$ -GFP-Nb to excess of CD4<sup>+</sup> HPB-ALL or CD4<sup>-</sup> DHL control cells analyzed by  $\gamma$ -counting (triplicates, arithmetic mean  $\pm$  SD, unpaired t-test, (\*\*\*)  $p < 0.001$ ). (B) Dynamic *in vivo* biodistribution of  $^{64}\text{Cu}$ -CD4-Nb1 in 2 hCD4KI mice by PET/MR. (C) Dynamic uptake quantification of  $^{64}\text{Cu}$ -CD4-Nb1 in non-T cell rich organs over 24 h ( $n = 3$  per group). (D) *Ex vivo* organ biodistribution analyzed by  $\gamma$ -counting.

## Supplementary Methods

| Name                        | Sequence 5' - 3'                                       | purpose                           |
|-----------------------------|--------------------------------------------------------|-----------------------------------|
| CALL001                     | GTCCTGGCTGCTCTTCTACAAGG                                | Nb library generation             |
| CALL002                     | GGTACGTGCTGTTGAACTGTTCC                                | Nb library generation             |
| FR1-1                       | CAT GGC NSA NGT GCA GCT GGT GGA NTC NGG NGG            | Nb library generation             |
| FR1-2                       | CAT GGC NSA NGT GCA GCT GCA GGA NTC NGG NGG            | Nb library generation             |
| FR1-3                       | CAT GGC NSA NGT GCA GCT GGT GGA NAG YGG NGG            | Nb library generation             |
| FR1-4                       | CAT GGC NSA NGT GCA GCT GCA GGA NAG YGG NGG            | Nb library generation             |
| FR1-ext1                    | GTAGGCCAGCCGGCCATGGCNSANGTGCAGCTGGTGG                  | Nb library generation             |
| FR1-ext2                    | GTAGGCCAGCCGGCCATGGCNSANGTGCAGCTGCAGGA                 | Nb library generation             |
| FR4-1                       | GAT GCG GCC GCN GAN GAN ACG GTG ACC NGN RYN CC         | Nb library generation             |
| FR4-2                       | GAT GCG GCC GCN GAN GAN ACG GTG ACC NGN GAN CC         | Nb library generation             |
| FR4-3                       | GAT GCG GCC GCN GAN GAN ACG GTG ACC NGR CTN CC         | Nb library generation             |
| FR4-4                       | GAT GCG GCC GCR CTN GAN ACG GTG ACC NGN RYN CC         | Nb library generation             |
| FR4-5                       | GAT GCG GCC GCR CTN GAN ACG GTG ACC NGN GAN CC         | Nb library generation             |
| FR4-6                       | GAT GCG GCC GCR CTN GAN ACG GTG ACC NGR CTN CC         | Nb library generation             |
|                             |                                                        |                                   |
| NGS fwd                     | ACACTCTTTCCCTACACGACGCTCTTCCGATCTGGATTGTTATTACTCGCGGCC | library PCR for NGS               |
| NGS rev                     | GACTGGAGTTCAGACGTGTGCTCTTCCGATCTGATCAGCTTCTGTTCTGCGGC  | library PCR for NGS               |
|                             |                                                        |                                   |
| hCD4 fwd                    | GGAGGATCCACAATGAACCGGGGAGTCCCTT                        | hCD4 expression                   |
| hCD4 rev                    | GGTCTCGAGTCAAATGGGGCTACATGTCTTCTGA                     | hCD4 expression                   |
| bsd fwd                     | ATACCCGGGGCCACCATGGCCAAGCCTTTGTCTC                     | hCD4 expression                   |
| bsd rev                     | TATGCGCGCTTAGCCCTCCACACATAACCAG                        | hCD4 expression                   |
|                             |                                                        |                                   |
| $\Delta$ D1 fwd             | GCAGTCTCTCACTGGAGCAGCGCTTTCGGATTGACTGCCAACTCTGACACC    | CD4 $\Delta$ D1 expression        |
| $\Delta$ D1 rev             | GCGCACGCGATCAGGCATTCCCTGAGTGGCTGCTGGGAGG               | CD4 $\Delta$ D1 expression        |
| $\Delta$ D1 $\Delta$ D2 fwd | GCAGTCTCTCACTGGAGCAGCGCTTTCAGAAAGCCTCCAGCATAG          | CD4 $\Delta$ D1 $\Delta$ D2 expr. |
| $\Delta$ D1 $\Delta$ D2 rev | GCGCACGCGATCAGGCATTCCCTGAGTGGCTGCTGGGAGG               | CD4 $\Delta$ D1 $\Delta$ D2 expr. |
| $\Delta$ D3 $\Delta$ D4 fwd | CCCACATGGTCCACCCCG                                     | CD4 $\Delta$ D3 $\Delta$ D4 expr. |
| $\Delta$ D3 $\Delta$ D4 rev | AGCTAGCACCACGATGTCTATTTTG                              | CD4 $\Delta$ D3 $\Delta$ D4 expr. |
|                             |                                                        |                                   |
| CD4-D1-4 f                  | ATACGTCTCAACTCTAAGAAAGTGGTGTGGGCAAAAAGG                | CD4-D1-4 production               |
| CD4-D1-4 r                  | TATGAATTCAGTGGTGTGGTGGTGGGCGAGAACCCTTGATGTTGGATTCC     | CD4-D1-4 production               |

Table S1: primers used in this study

| <b>Cytokine</b>                                            | <b>indicative for</b> |
|------------------------------------------------------------|-----------------------|
| Interleukin 1 $\beta$ (IL-1 $\beta$ )                      | proinflammatory       |
| Interleukin 1 receptor antagonist (IL-1RA)                 | antiinflammatory      |
| Interleukin 4 (IL-4)                                       | antiinflammatory      |
| Interleukin 6 (IL-6)                                       | pro-/antiinflammatory |
| Interleukin 8 (IL-8)                                       | proinflammatory       |
| Interleukin 10 (IL-10)                                     | antiinflammatory      |
| Interleukin 12 p70 (IL-12p70)                              | proinflammatory       |
| Interleukin 13 (IL-13)                                     | antiinflammatory      |
| Granulocyte-macrophage colony-stimulating factor (GM-CSF)  | pro-/antiinflammatory |
| Interferon $\gamma$ (IFN $\gamma$ )                        | proinflammatory       |
| Monocyte chemoattractant protein 1 (MCP-1)                 | proinflammatory       |
| Macrophage inflammatory protein 1 $\beta$ (MIP-1 $\beta$ ) | proinflammatory       |
| Tumor necrosis factor $\alpha$ (TNF- $\alpha$ )            | proinflammatory       |
| Vascular endothelial growth factor (VEGF)                  | wound healing factor  |

Table S2: cytokines analyzed in this study

---

**Table HDX summary**

---

|                                                  |                                                    |
|--------------------------------------------------|----------------------------------------------------|
| State                                            | CD4 & CD4 bound by Nb1; Nb2; Nb3                   |
| HDX reaction details                             | 1 x PBS pH 7.4, 25 °C, 90% D <sub>2</sub> O        |
| Time points                                      | 5 & 50 min                                         |
| Av. back exchange (Synthetic peptides)           | 24%                                                |
| Digest conditions                                | 2 min in an water ice-bath, 30 µl pepsin beads     |
| Number of identified Peptides /Sequence coverage | 116 / 88%                                          |
| Average peptide length / average redundancy      | 14.6 (Std. Dev. 8.3) / 4.6                         |
| Technical replicates (triplicate)                | min 2 of 3 peptides per time point, in both states |
| Determined ΔHX threshold for each time point     | 0.25 – 0.27 Da                                     |
| Significant differences in HDX                   | Students t-distribution on 95% confidence level    |

---

**Table S3: HDX-MS Summary**
